# Supplementary material for: A Novel Method for Identifying Parkin Binding Agents in Complex Preparations of Herbal Medicines
Source: Hindawi journal article supplement (doi:10.1155/2022/3260243), 2022-01-01
Supplement: f1 [file 3260243.f1.pdf]

## SUPPLEMENTARY INFORMATION

### A Novel Method for Identifying Parkin Binding

### Agents in Complex Preparations of Herbal Medicines

Feng-Jiao Li <sup>a,b,#</sup>, Fan Zhang <sup>a,d,#</sup>, Xu-Dong He <sup>a,d,#</sup>, Xin Liu<sup>c</sup>, Jian-Kang Mu <sup>a,d</sup>, Min Yang <sup>a,d</sup>, Yan-Qin Li <sup>a,d</sup>, Wen Gu <sup>a,d</sup>, Jie Yu <sup>a,d,\*</sup>, Xing-Xin Yang <sup>a,d,\*</sup>

<sup>a</sup> College of Pharmaceutical Science, Yunnan University of Chinese Medicine, 1076

Yuhua Road, Kunming 650500, China

<sup>b</sup> Zhaotong City Institute of Gastrodia Elata, Zhaotong 657000, China

<sup>c</sup> Beijing Entry-Exit Inspection and Quarantine Bureau, Beijing 100026, China

<sup>d</sup> Yunnan Key Laboratory of Southern Medicine Utilization, 1076 Yuhua Road, Kunming 650500, China

<sup>#</sup> These authors contributed equally to this work

**Corresponding author:** Dr. Jie Yu (Tel./Fax.: +86-871-65933303; Email: cz.yujie@gmail.com) and Dr. Xing-Xin Yang (Tel./Fax.: +86-871-65933303; Email: yxx78945@163.com)

|    |                                                                                          |
|----|------------------------------------------------------------------------------------------|
| 22 | <b>Table of contents</b>                                                                 |
| 23 | <b>Supplementary Experimental Procedures</b>                                             |
| 24 | <b>Supplementary Figures and Tables</b>                                                  |
| 25 | <b>1. FIGURE S1.</b> Analytical procedures for the identification of Parkin ligands in   |
| 26 | herbal medicines.                                                                        |
| 27 | <b>2. FIGURE S2.</b> Effect of Parkin concentration on fishing of Parkin ligands from    |
| 28 | SFR extract.                                                                             |
| 29 | <b>3. FIGURE S3.</b> Effect of concentration of SFR sample on fishing of Parkin ligands. |
| 30 | <b>4. FIGURE S4.</b> Effect of incubation time on fishing of Parkin ligands from SFR     |
| 31 | extract.                                                                                 |
| 32 | <b>5. FIGURE S5.</b> Effect of Parkin concentration on fishing of Parkin ligands from    |
| 33 | PCRR extract.                                                                            |
| 34 | <b>6. FIGURE S6.</b> Effect of concentration of PCRR sample on fishing of Parkin         |
| 35 | ligands.                                                                                 |
| 36 | <b>7. FIGURE S7.</b> Effect of incubation time on fishing of Parkin ligands from PCRR    |
| 37 | extract.                                                                                 |
| 38 | <b>8. Table S1.</b> HPLC–DAD conditions for all analyzed samples.                        |
| 39 | <b>9. Table S2.</b> LC/MS data for the four reference solutions.                         |
| 40 | <b>10. Table S3.</b> LC/MS data and assignment of four Parkin ligands in SFR extract.    |
| 41 | <b>11. Table S4.</b> LC/MS data and assignment of four Parkin ligands in PCRR extract.   |
| 42 |                                                                                          |

### **Supplementary Experimental Procedure**

#### **Preparation of freeze-dried powder of Sophorae Flavescentis Radix (SFR) and Polygoni Cuspidati Rhizoma et Radix (PCRR) extract.**

Pulverized dried samples of SFR and PCRR (50 g) were soaked for 30 min in 500 mL methanol, and extracted using ultrasonication (500 W, 40 KHz) for 60 min. The extracted solution was filtered and collected, and the residue was ultrasonicated (500 W, 40 KHz) with 400 mL of 70% methanol for another 60 min. Extracted solutions were then filtered. Next, the two successive filtrates were mixed and evaporated using an N-1100D-WD rotatory evaporator (Ai Lang Instrument Co., Ltd., Shanghai, China) at 45 °C under reduced pressure. Finally, the concentrate was lyophilized to powder with a FD8-10B freeze dryer (SIM International Group Co. Ltd., Newark, DE, USA). Obtained powder of SFR and PCRR extracts was stored in a dryer at room temperature until use.

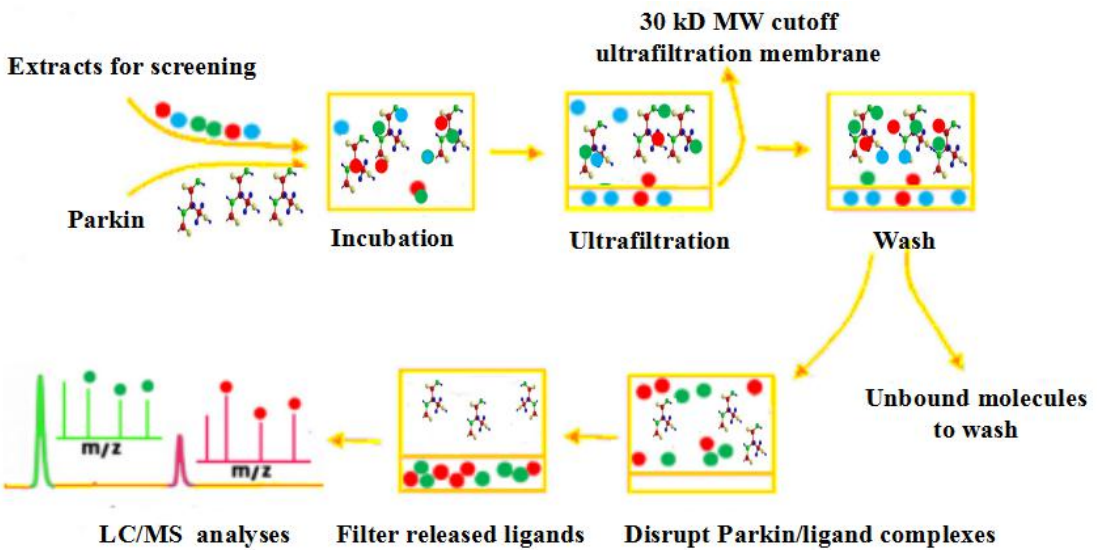

58  
59     **FIGURE S1. Analytical procedures for the identification of Parkin ligands in**  
60     **herbal medicines.**

63  
64

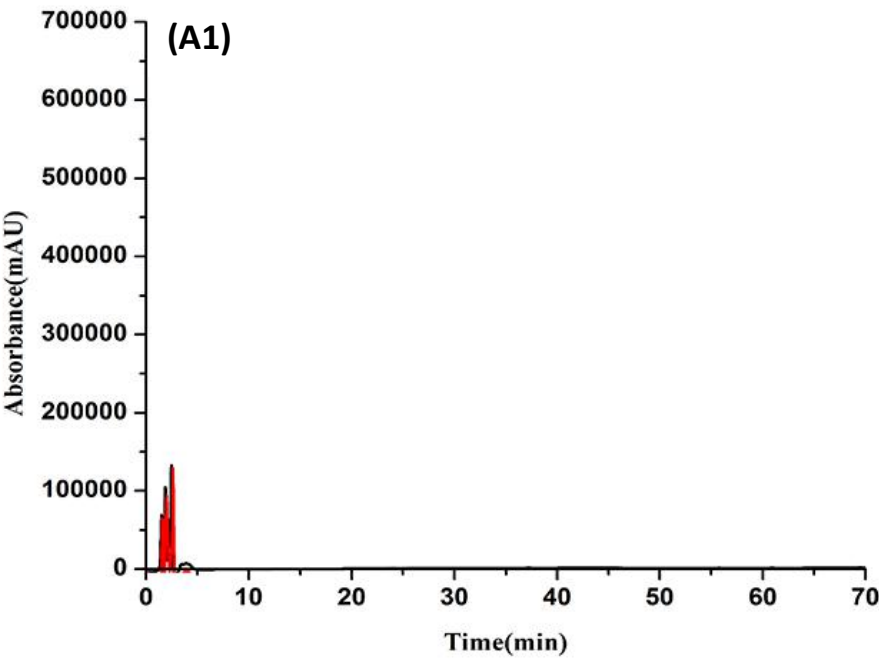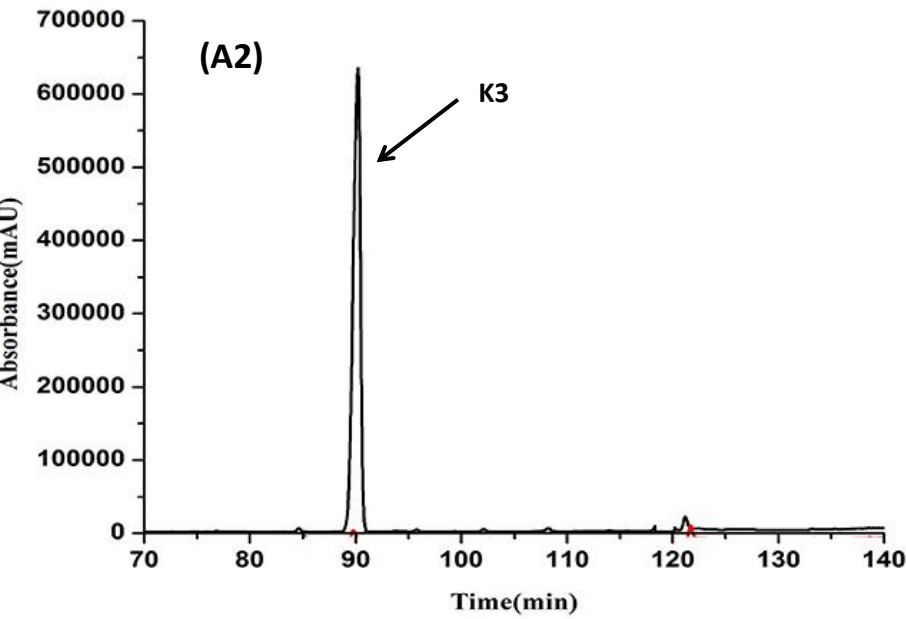

65  
66  
67

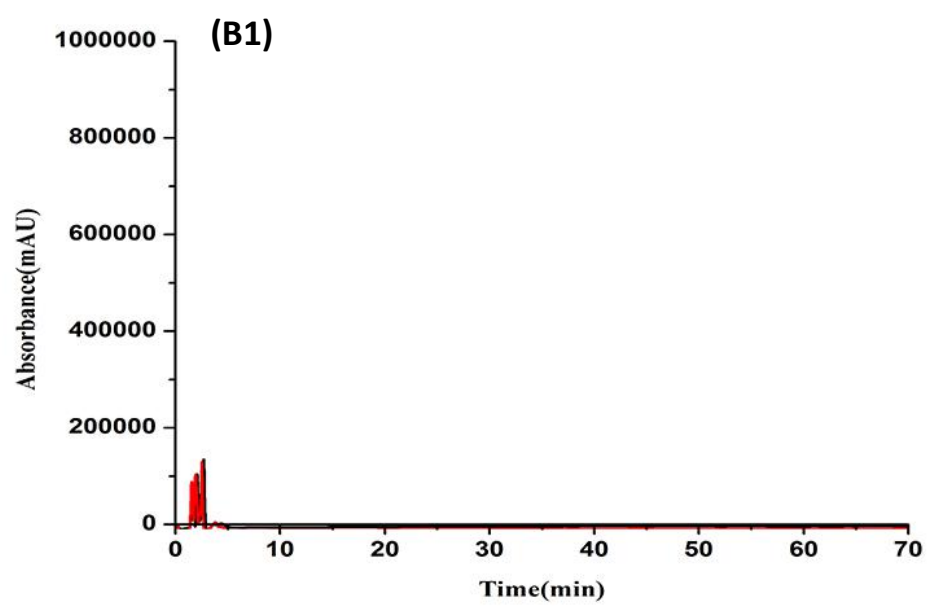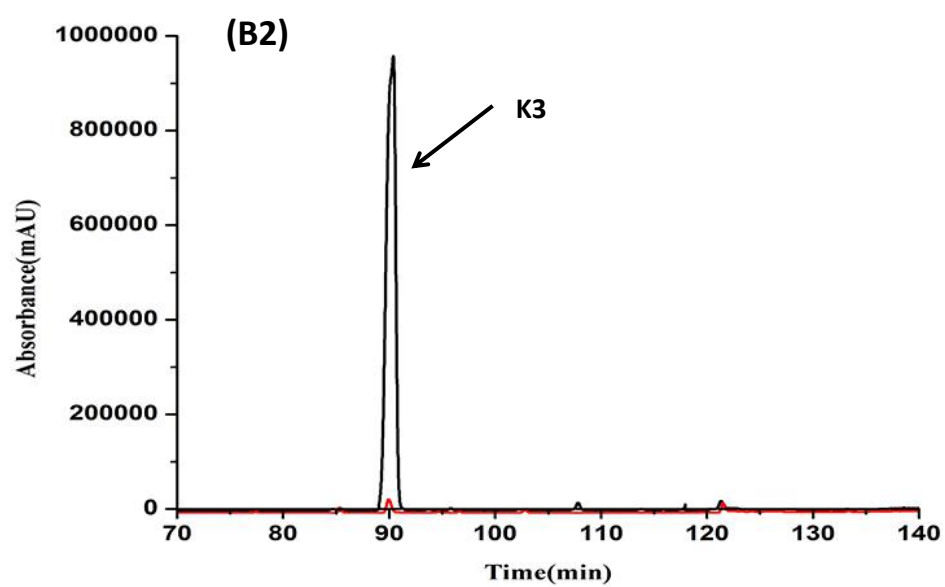

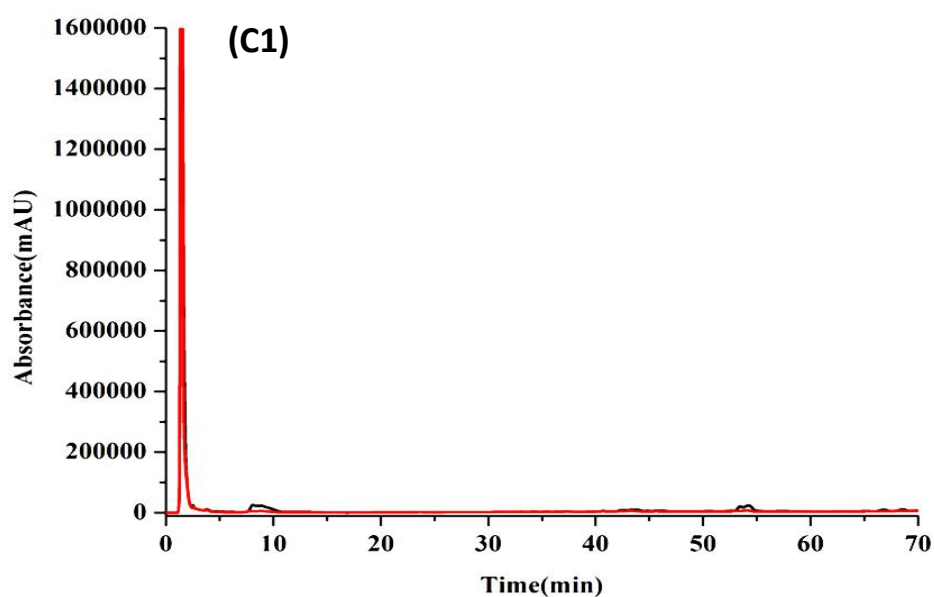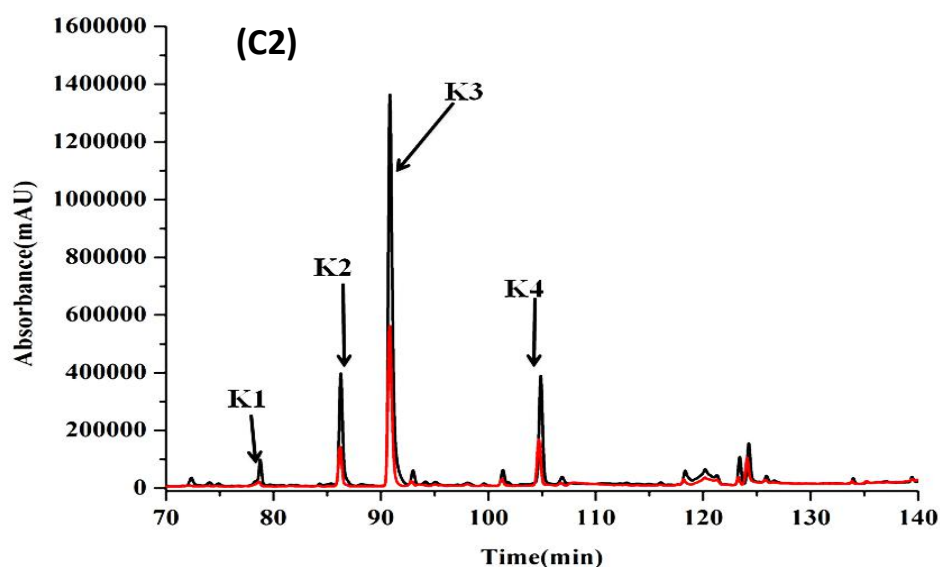

**FIGURE S2. Effect of Parkin concentration on fishing of Parkin ligands from SFR extract.** The concentrations of Parkin were 0.25 (A1 and A2; A1, 0–70 min; A2, 70–140 min), 0.50 (B1 and B2; B1, 0–70 min; B2, 70–140 min) and 1.00 (C1 and C2; C1, 0–70 min; C2, 70–140 min). Compared to the control, which was comprised of denatured Parkin (red line), the HPLC chromatograms of the screened SFR extract showed four (K1–K4) peaks that were enhanced due to specific binding with Parkin (black line). The concentration of SFR sample and incubation time were 10.5 g/L and 60 min, respectively.

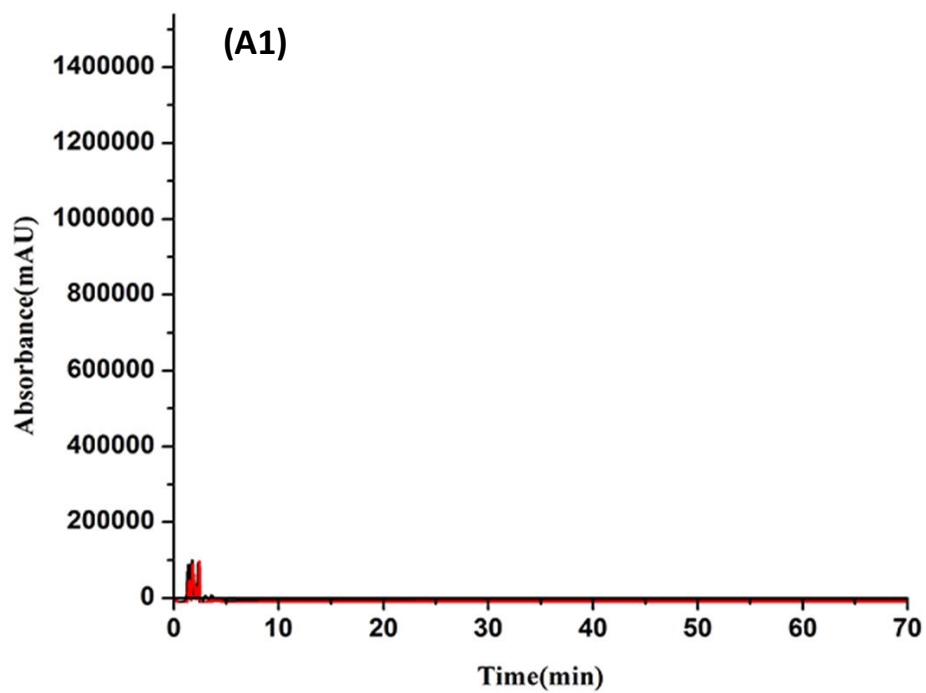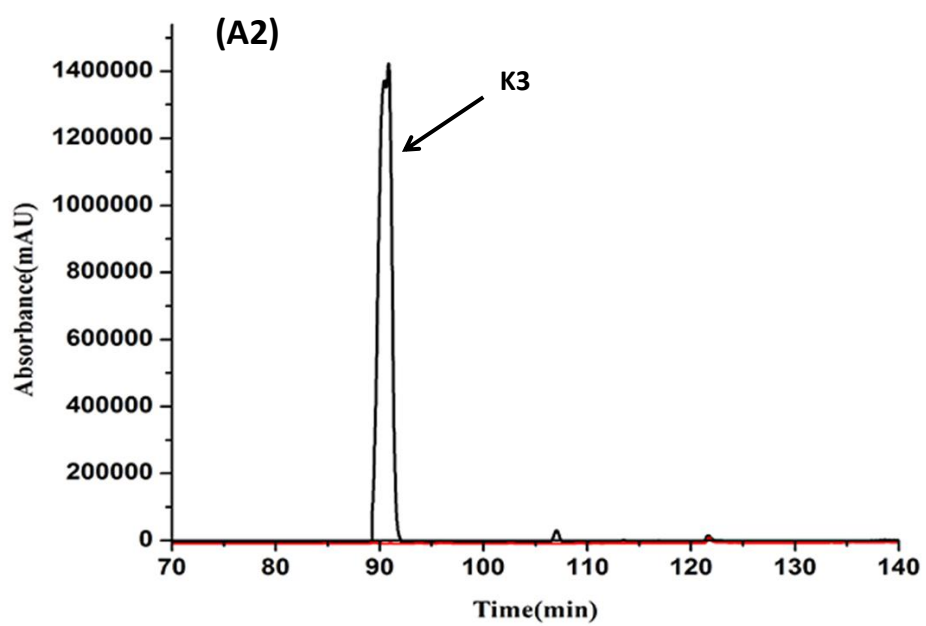



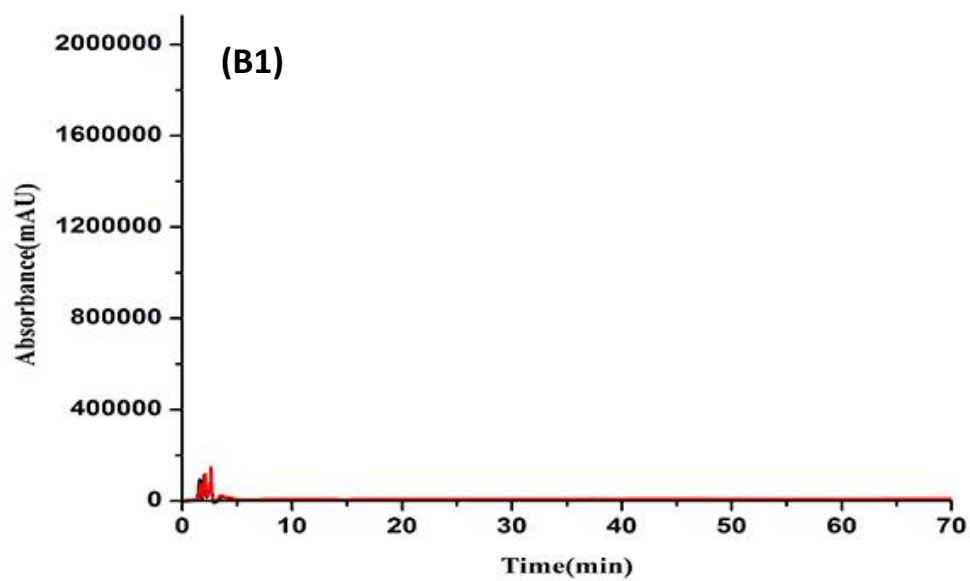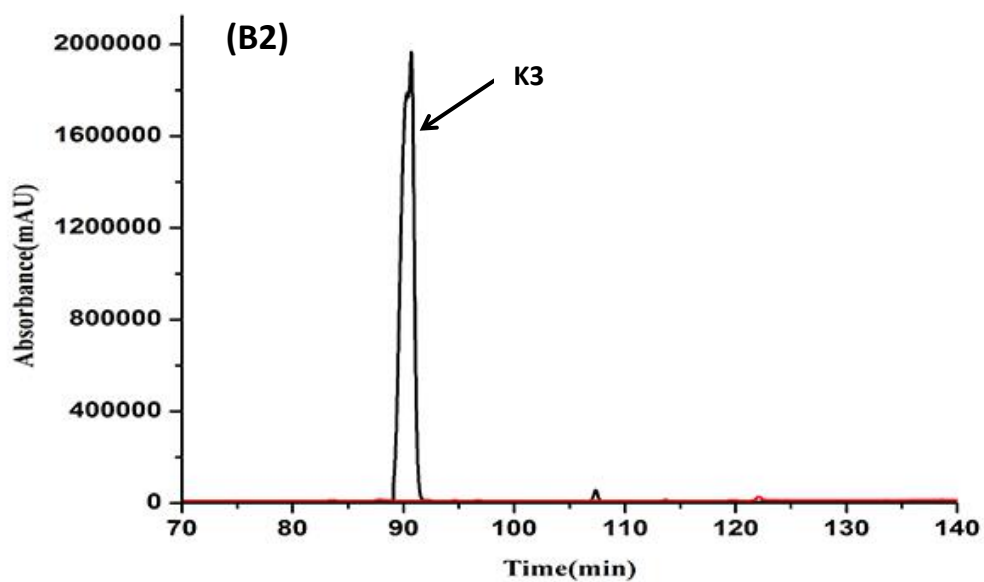

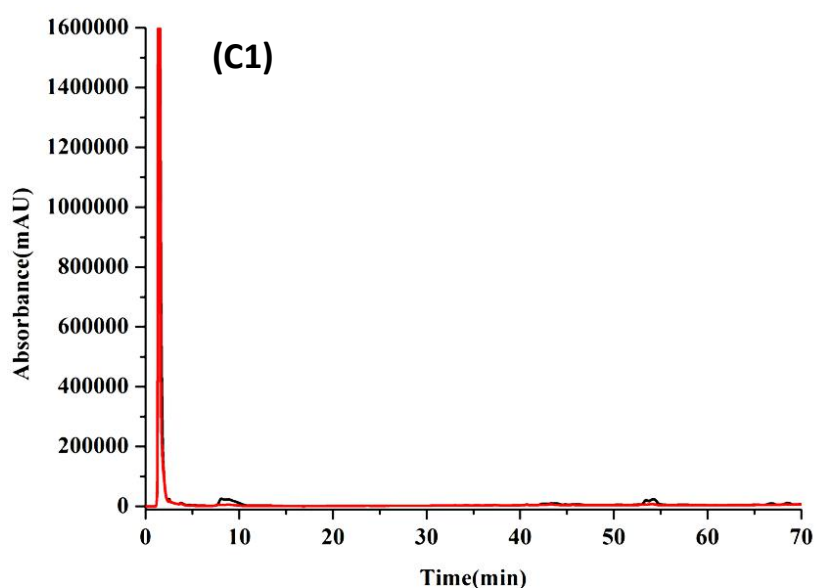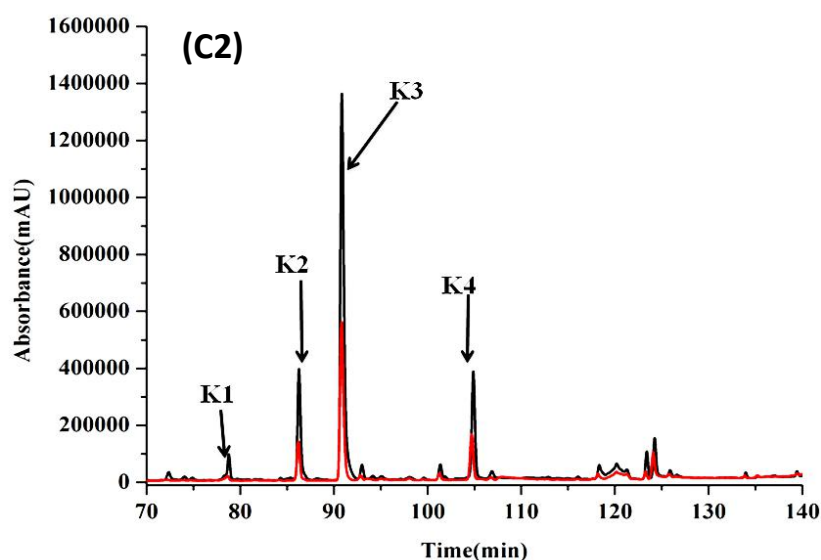

**FIGURE S3. Effect of concentration of SFR sample on fishing of Parkin ligands.**

The concentrations of SFR sample were 2.625 (A1 and A2; A1, 0–70 min; A2, 70–140 min), 5.25 (B1 and B2; B1, 0–70 min; B2, 70–140 min) and 10.50 (C1 and C2; C1, 0–70 min; C2, 70–140 min). Compared to the control, which was comprised of denatured Parkin (red line), the HPLC chromatograms of the screened SFR extract showed four (K1–K4) peaks that were enhanced due to specific binding with Parkin (black line). The concentration of Parkin sample and incubation time were 1.0 g/L and 60 min, respectively.

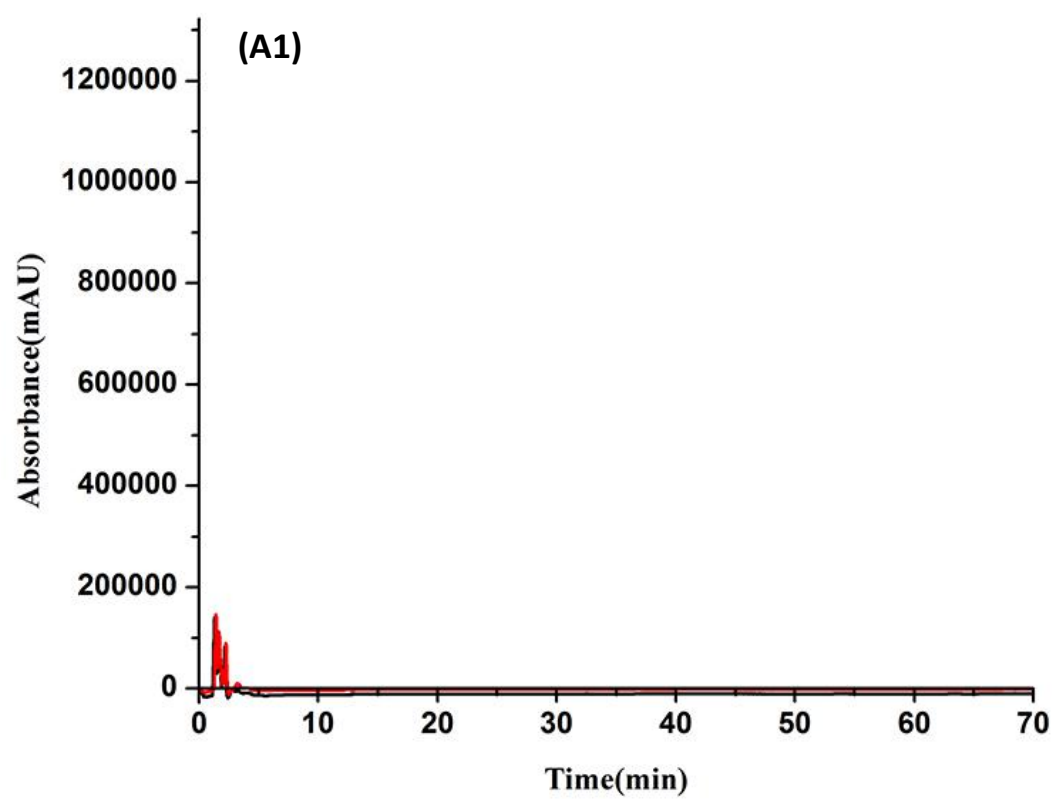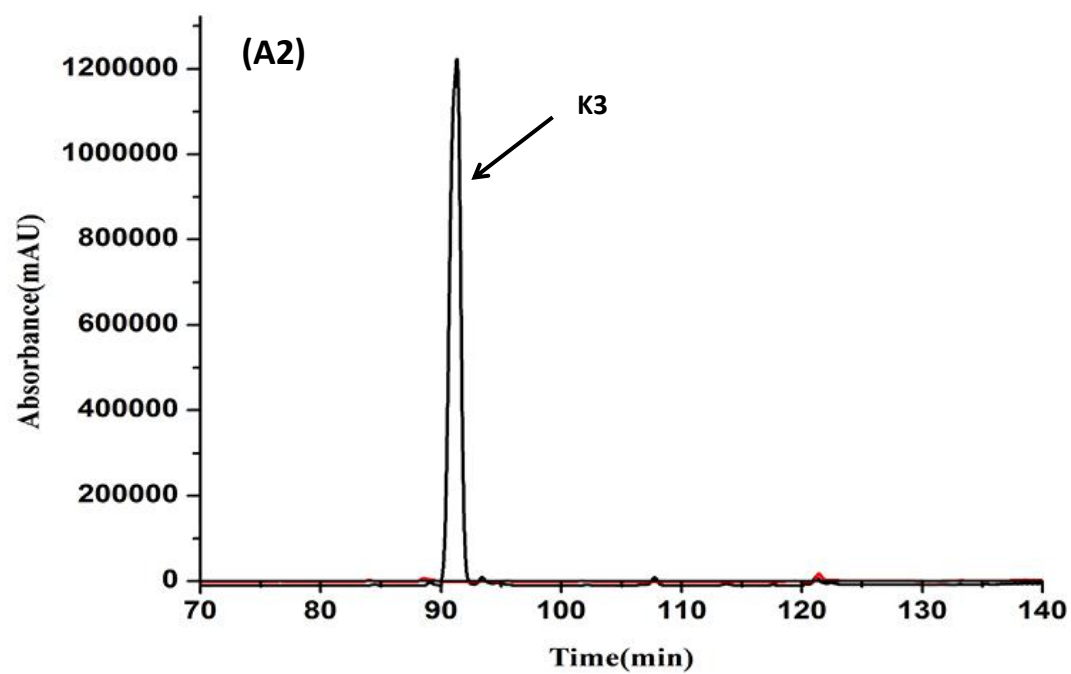

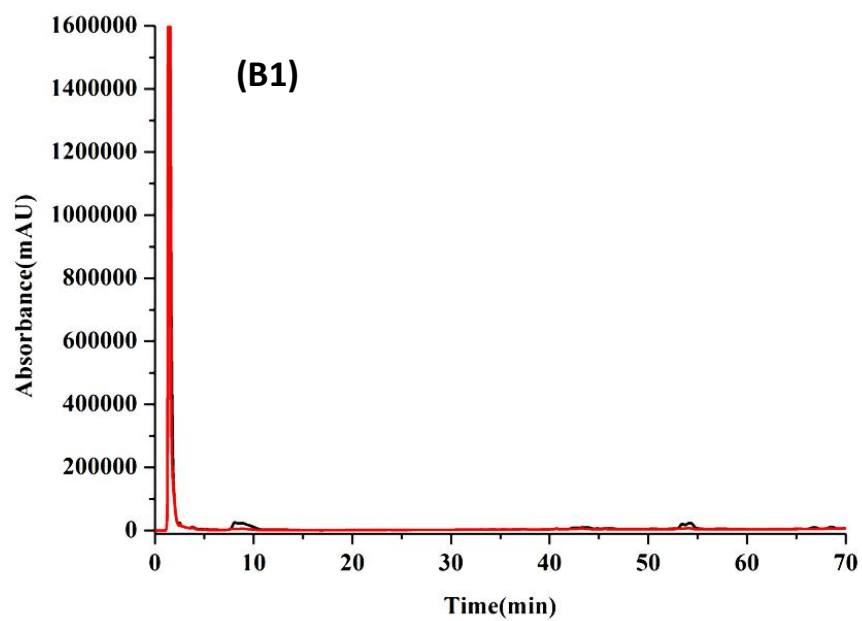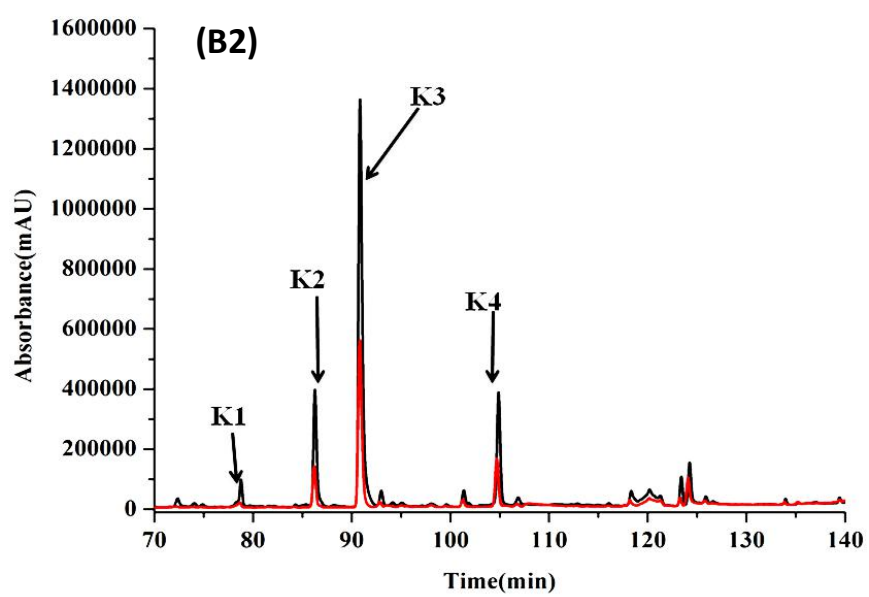

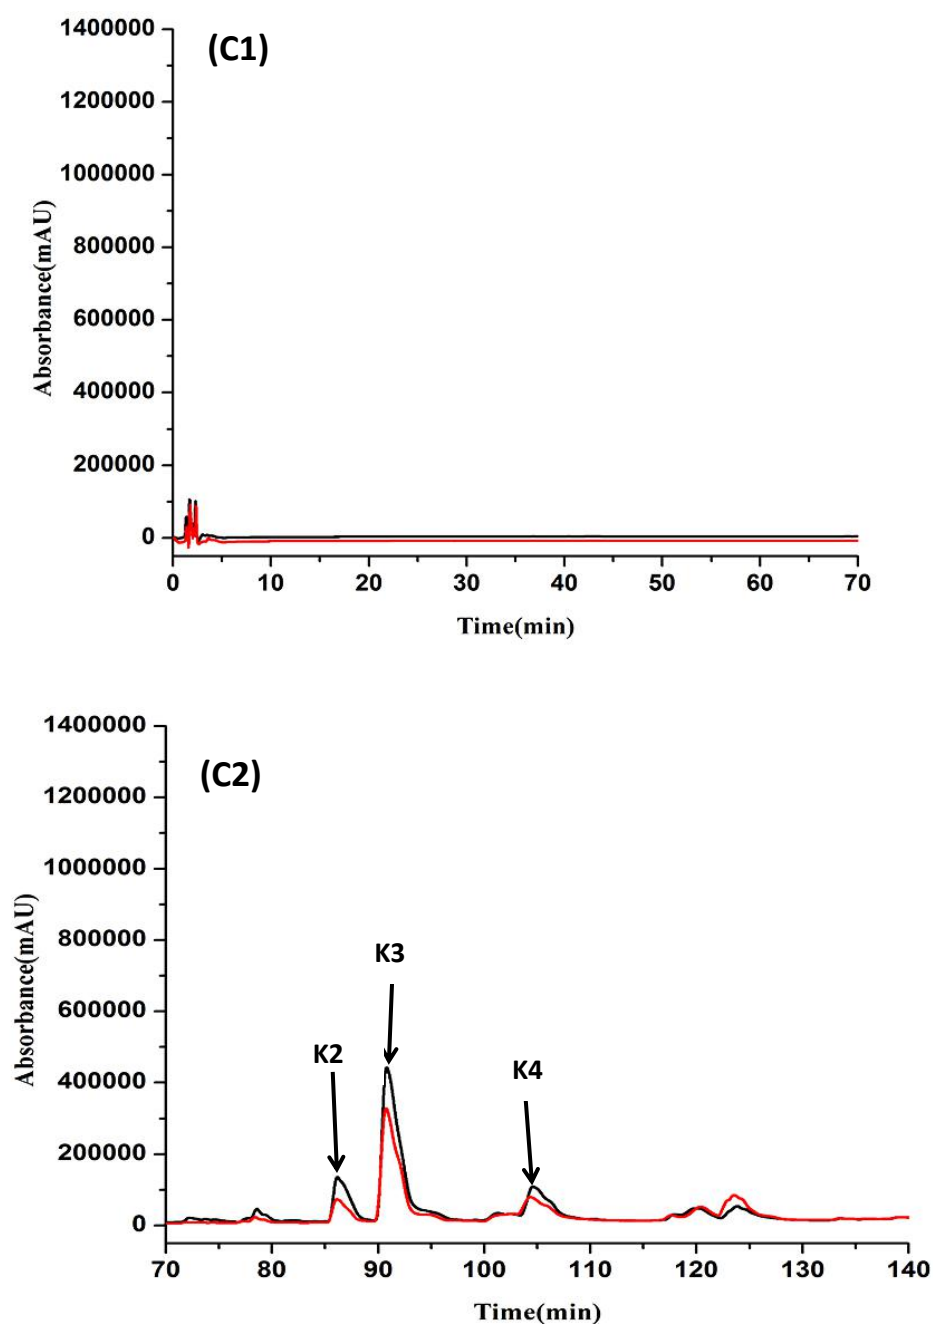

**FIGURE S4. Effect of incubation time on fishing of Parkin ligands from SFR extract.** Incubation times were 30 (A1 and A2; A1, 0–70 min; A2, 70–140 min), 60 (B1 and B2; B1, 0–70 min; B2, 70–140 min), and 90 (C1 and C2; C1, 0–70 min; C2, 70–140 min). Compared to the control, which was comprised of denatured Parkin (red line), the HPLC chromatograms of the screened SFR extract showed four (K1–K4) peaks that were enhanced due to specific binding with Parkin (black line). The concentrations of Parkin and SFR sample were 1.00 g/L and 10.5 g/L, respectively.

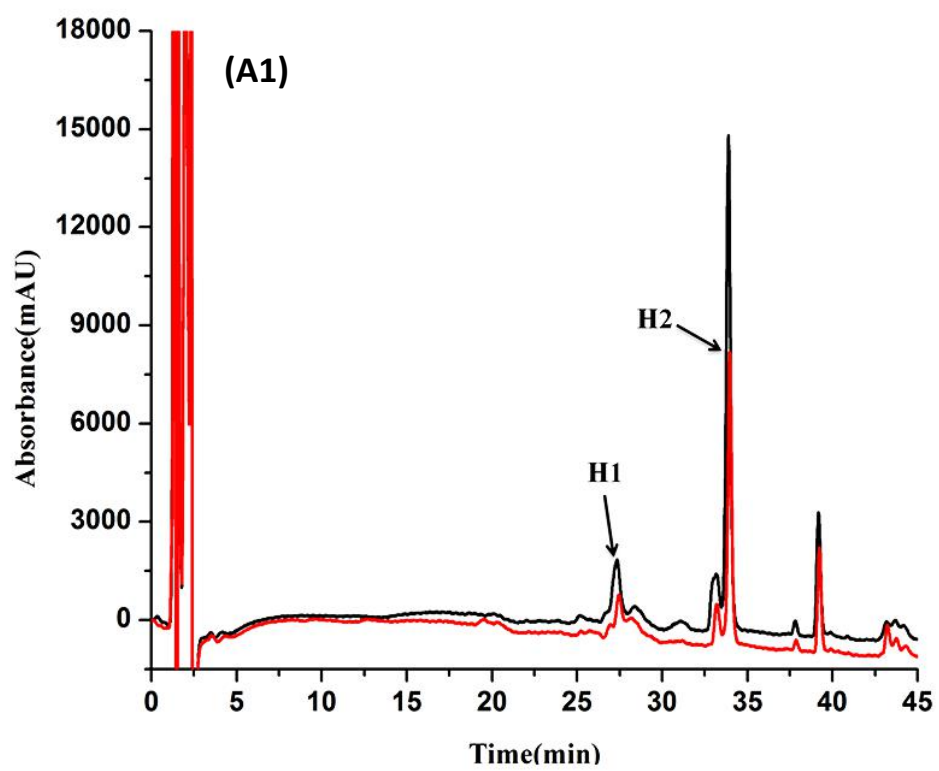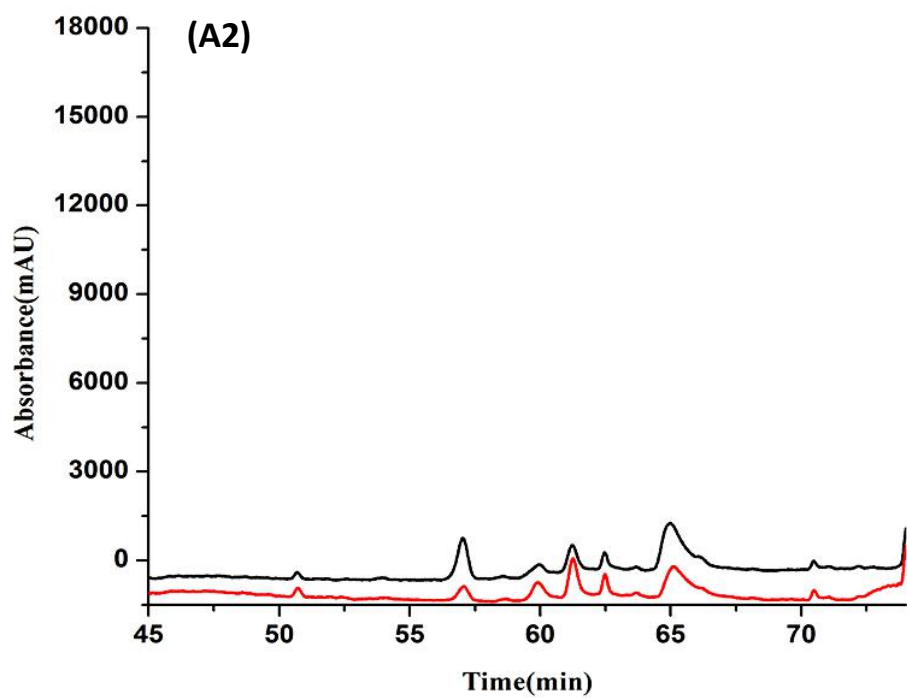

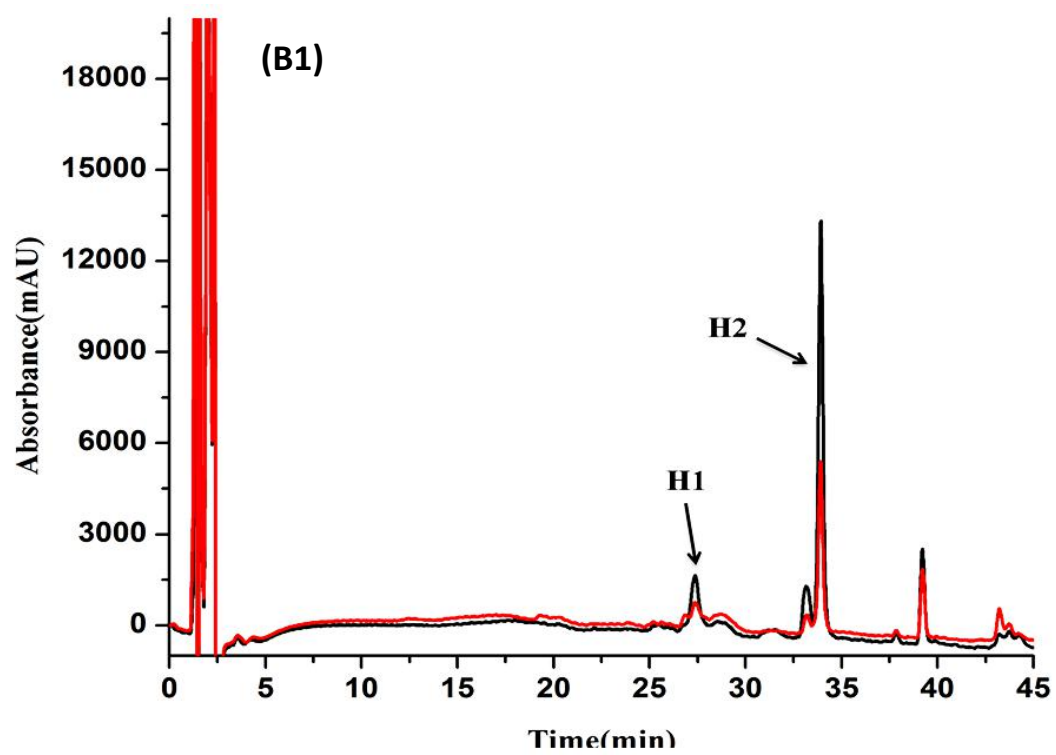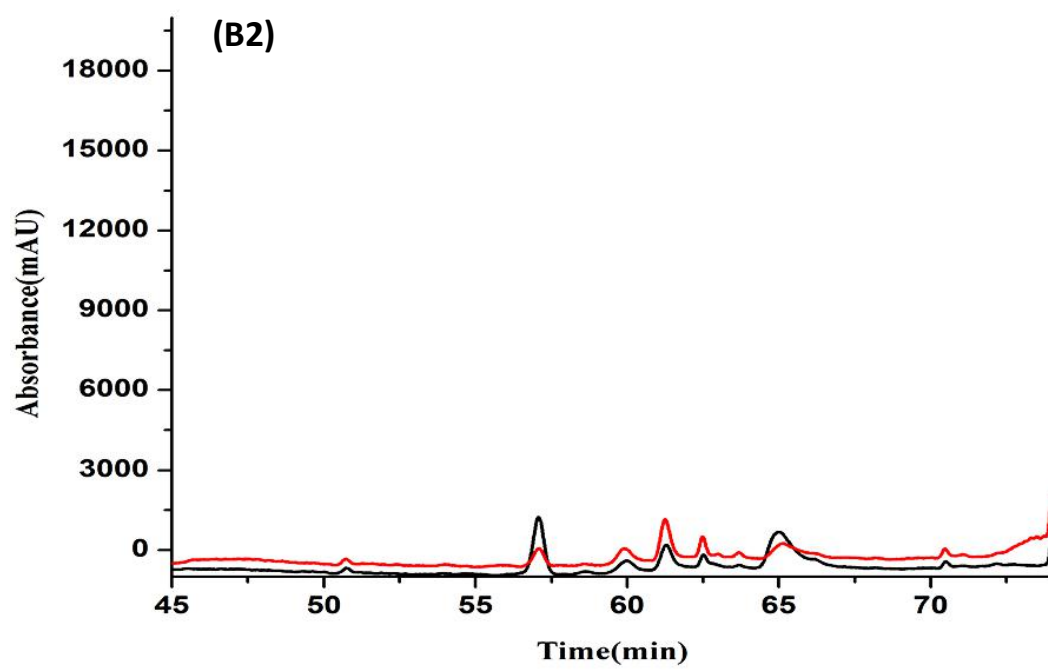

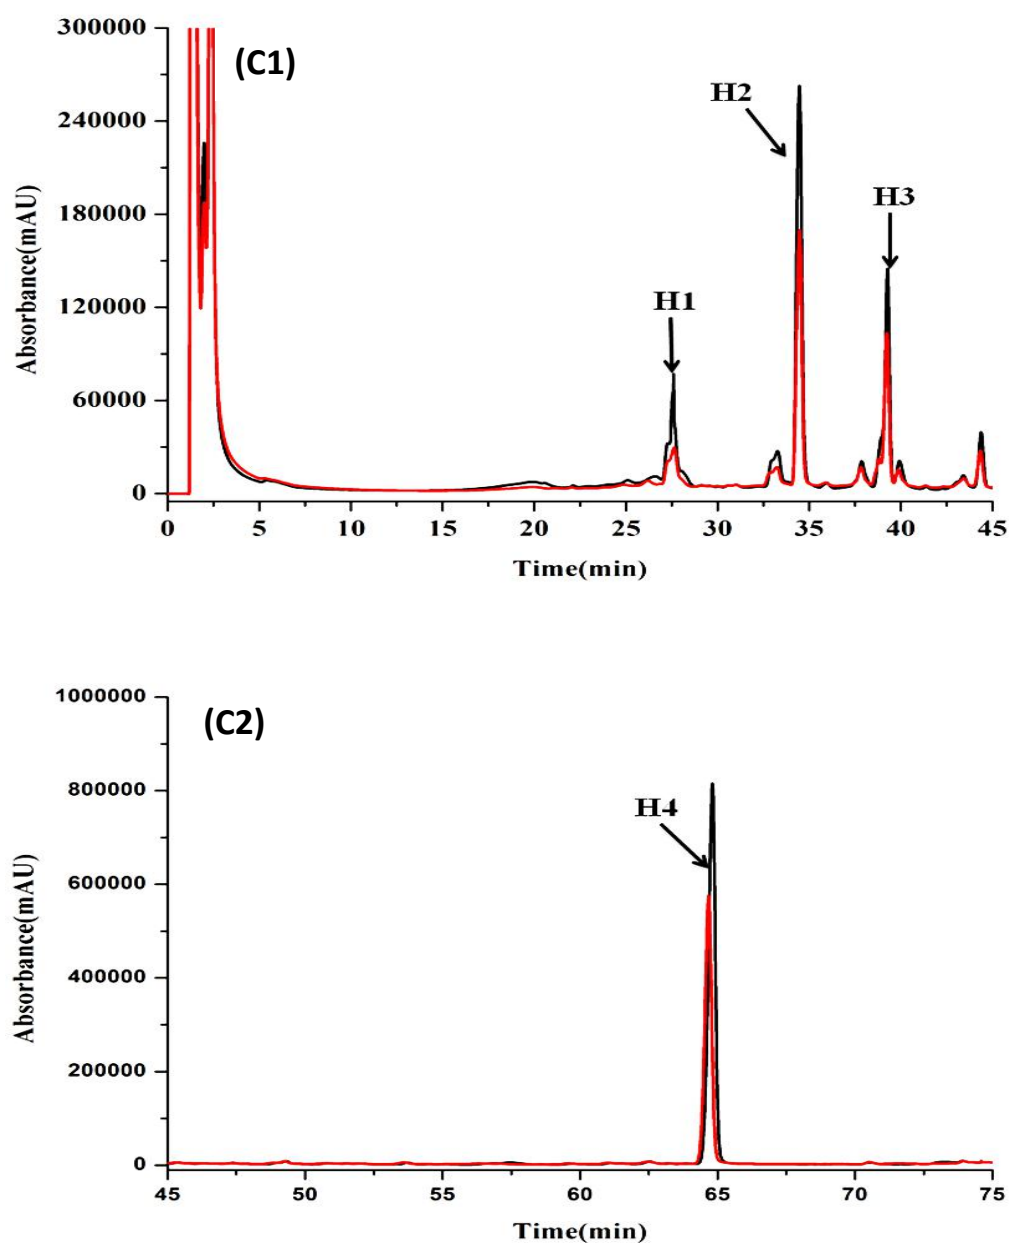

**FIGURE S5. Effect of Parkin concentration on fishing of Parkin ligands from PCRR extract.** The concentrations of Parkin were 0.25 (A1 and A2; A1, 0–45 min; A2, 45–75 min), 0.50 (B1 and B2; B1, 0–45 min; B2, 45–75 min). Compared to the control and, 1.00 (C1 and C2; C1, 0–45 min; C2, 45–75 min), which was comprised of denatured Parkin (red line), the HPLC chromatograms of the screened PCRR extract showed four (H1–H4) peaks that were enhanced due to specific binding with Parkin (black line). The concentration of PCRR sample and incubation time were 7.5 g/L and 60 min, respectively.



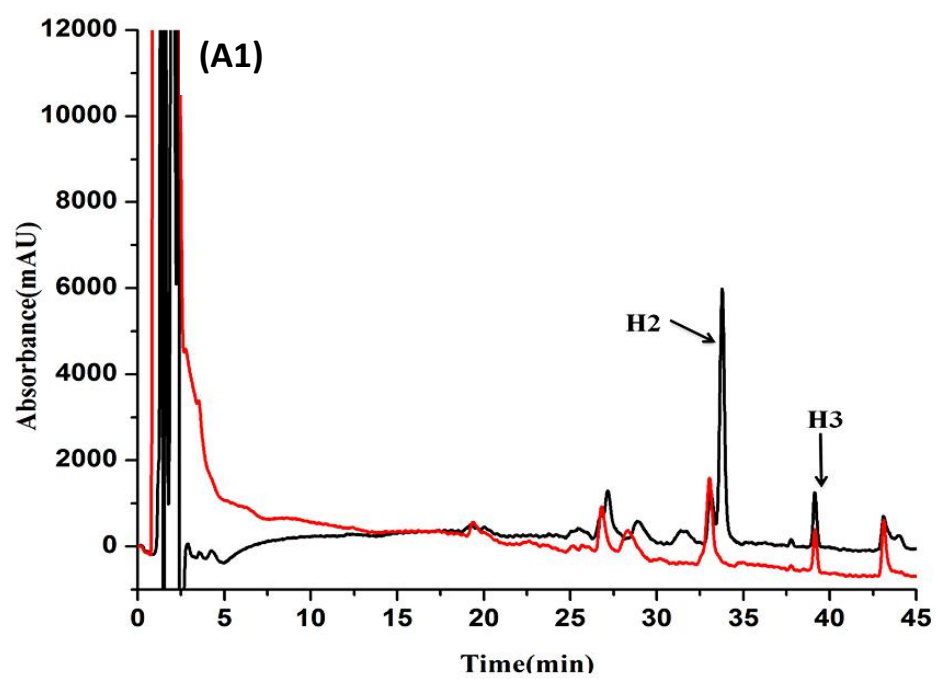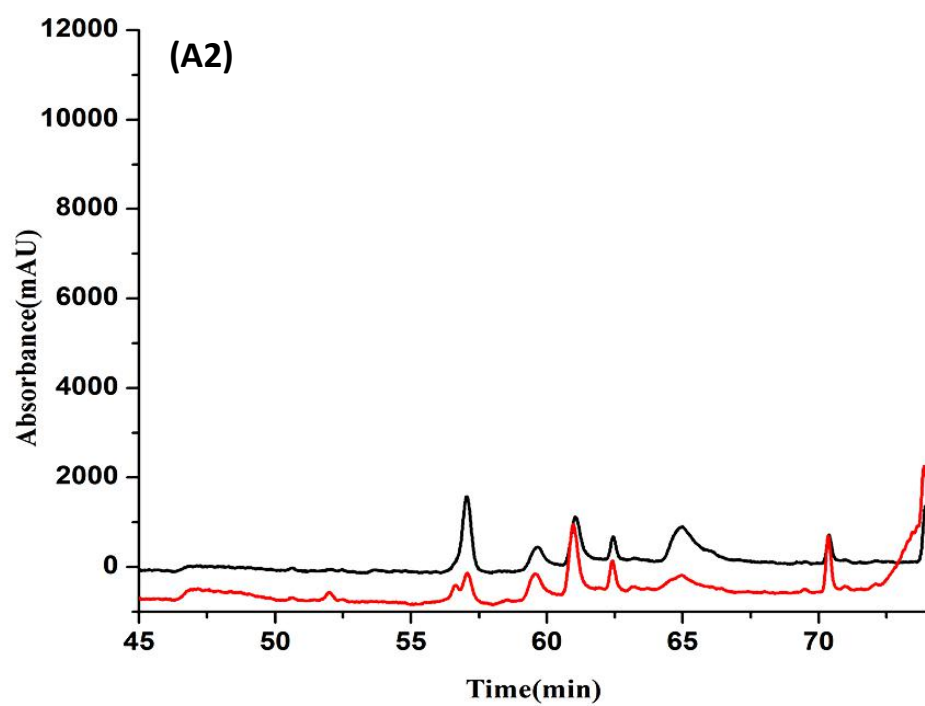

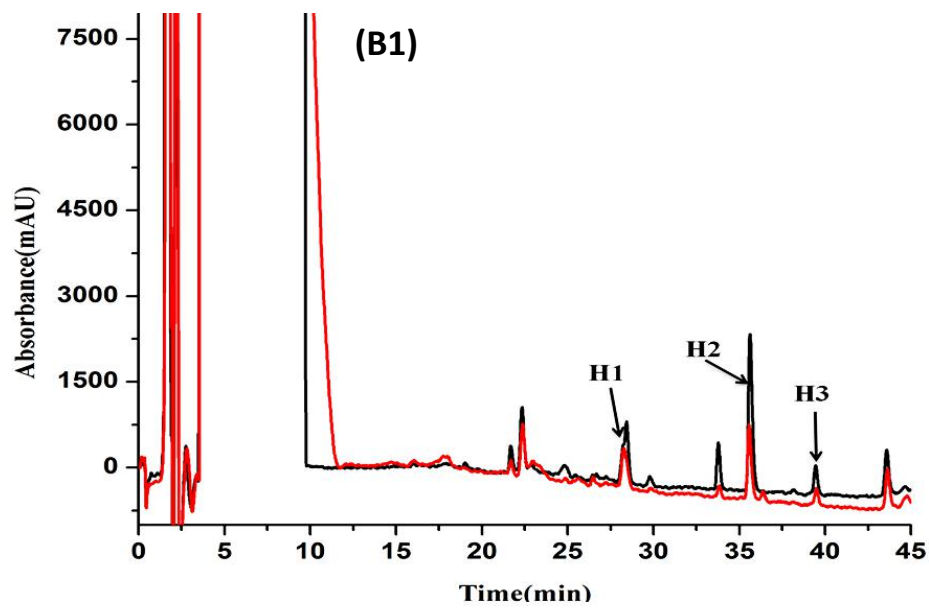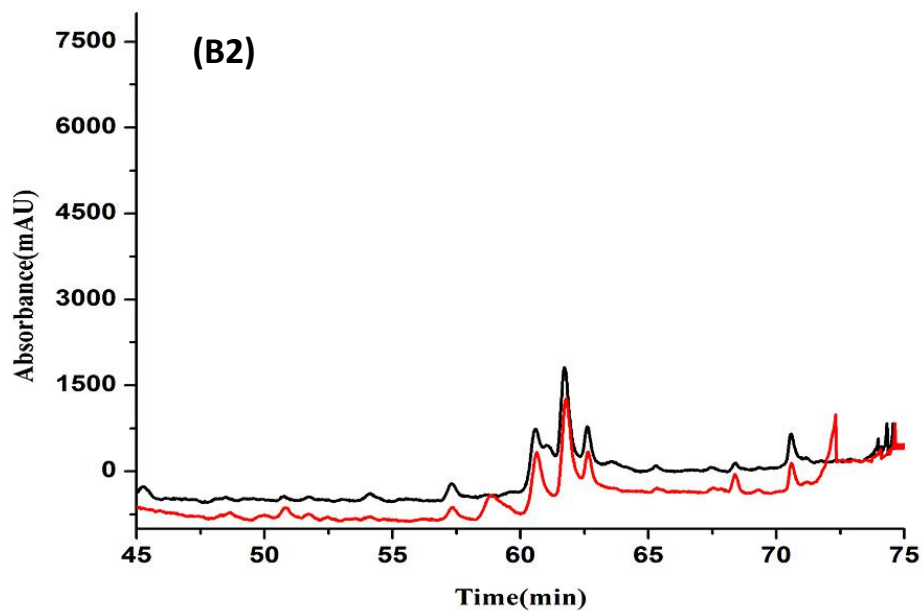

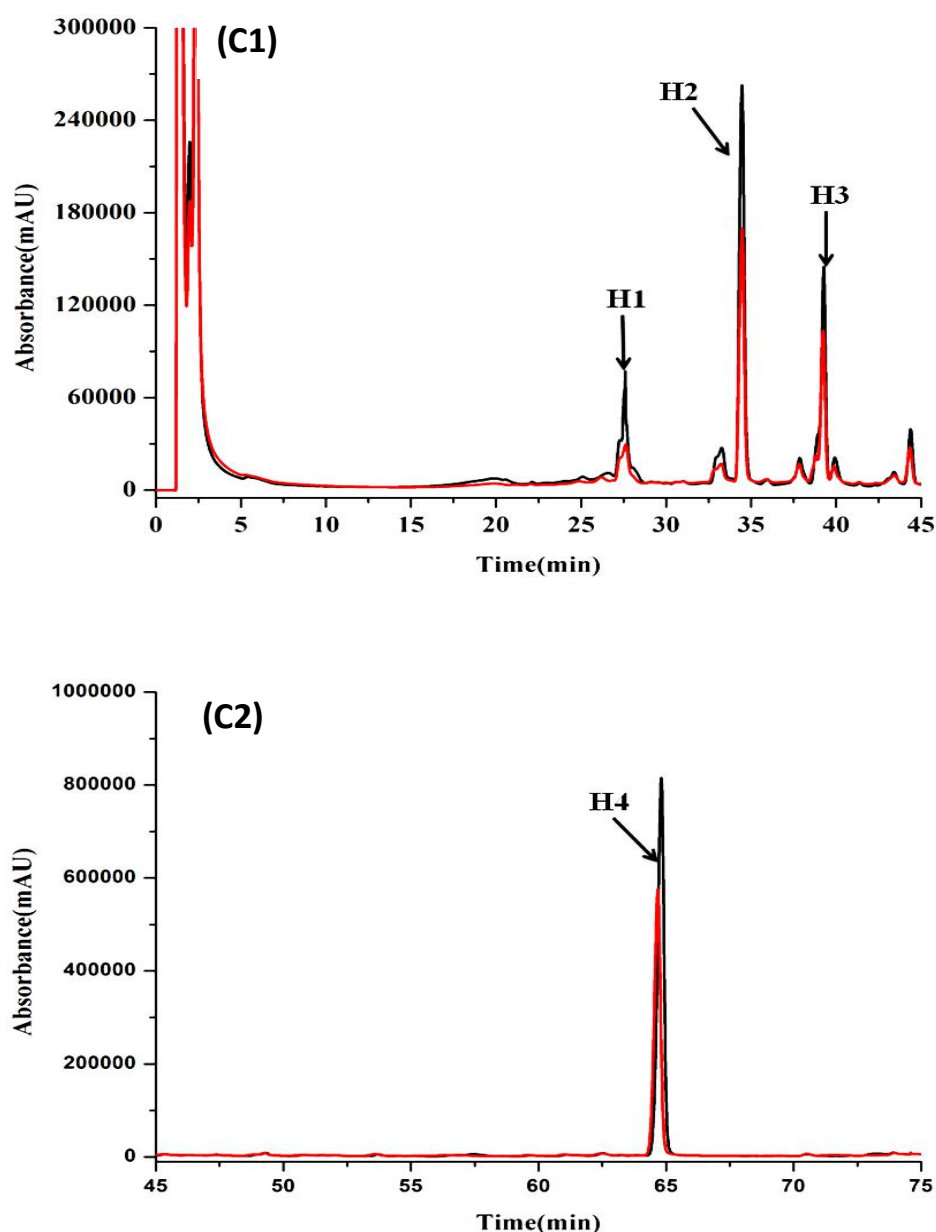

**FIGURE S6. Effect of concentration of PCRR sample on fishing of Parkin ligands.** The concentrations of PCRR sample were 1.875 (A1 and A2; A1, 0–45 min; A2, 45–75 min), 3.75 (B1 and B2; B1, 0–45 min; B2, 45–75 min) and 7.5 (C1 and C2; C1, 0–45 min; C2, 45–75 min). Compared to the control, which was comprised of denatured Parkin (red line), the HPLC chromatograms of the screened PCRR extract showed four (H1–H4) peaks that were enhanced due to specific binding with Parkin (black line). The concentration of Parkin sample and incubation time were 1.0 g/L and 60 min, respectively.

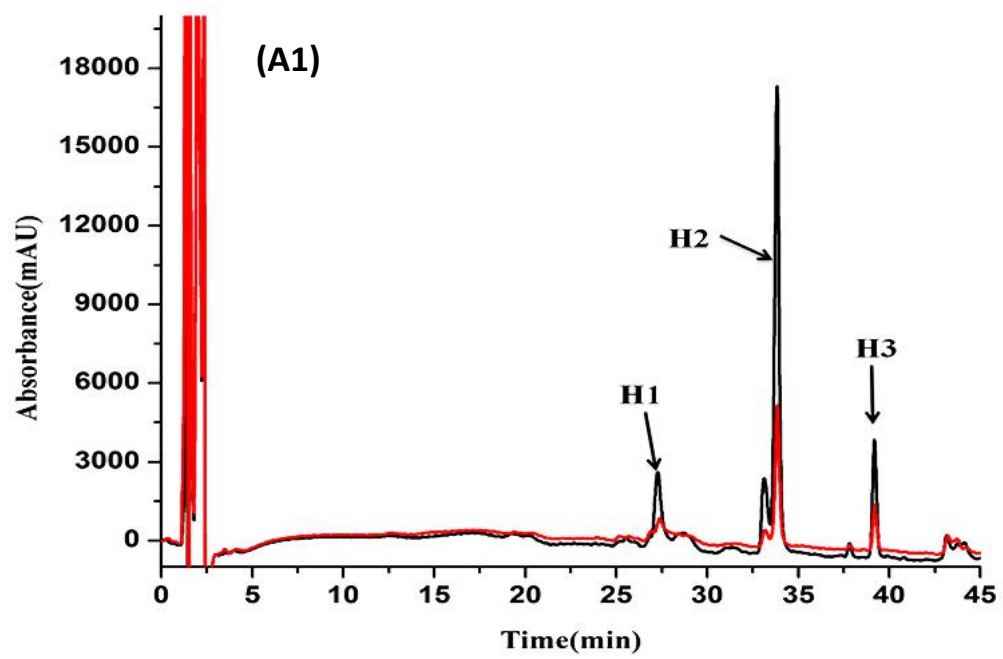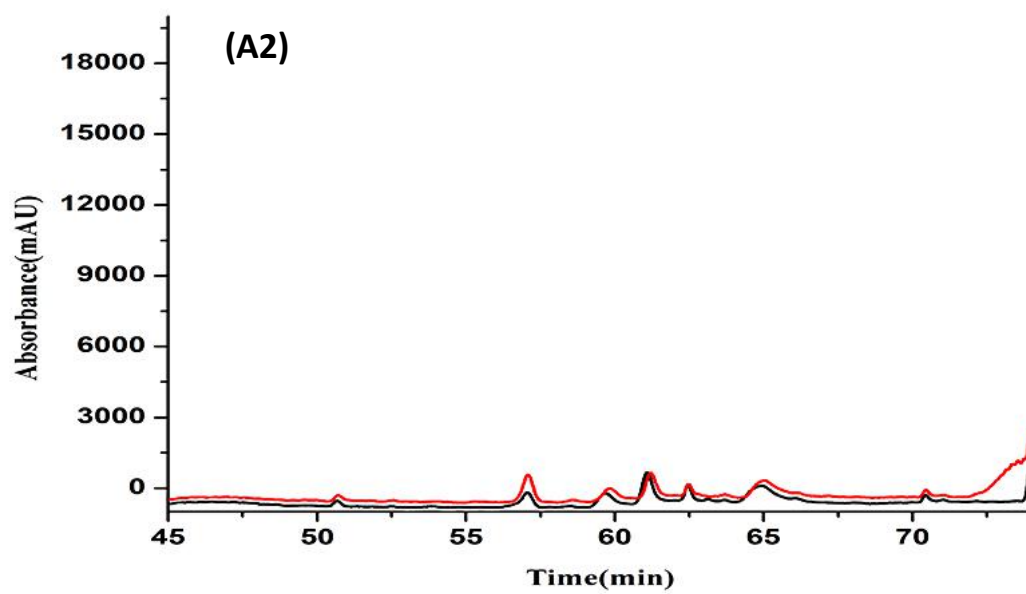

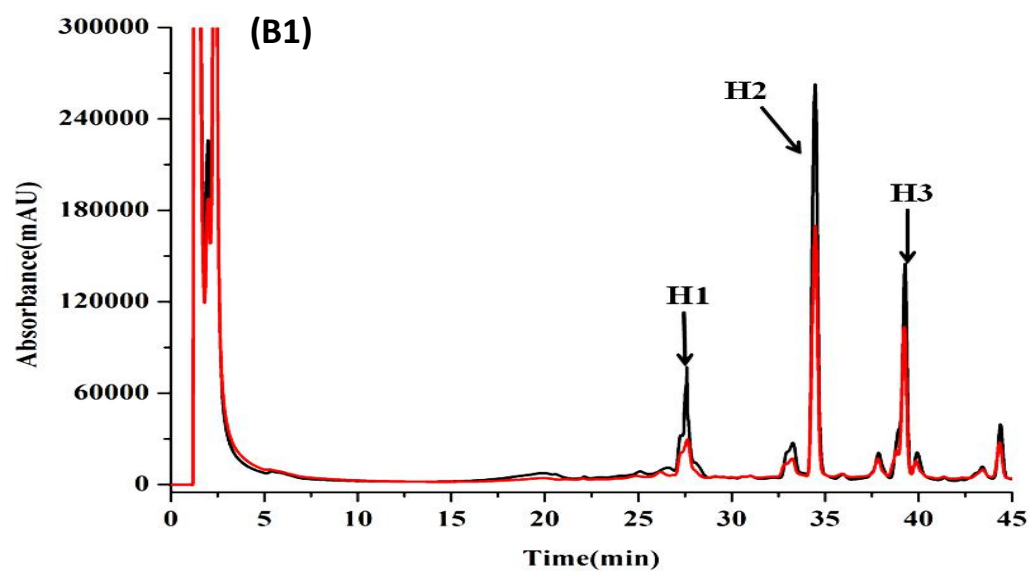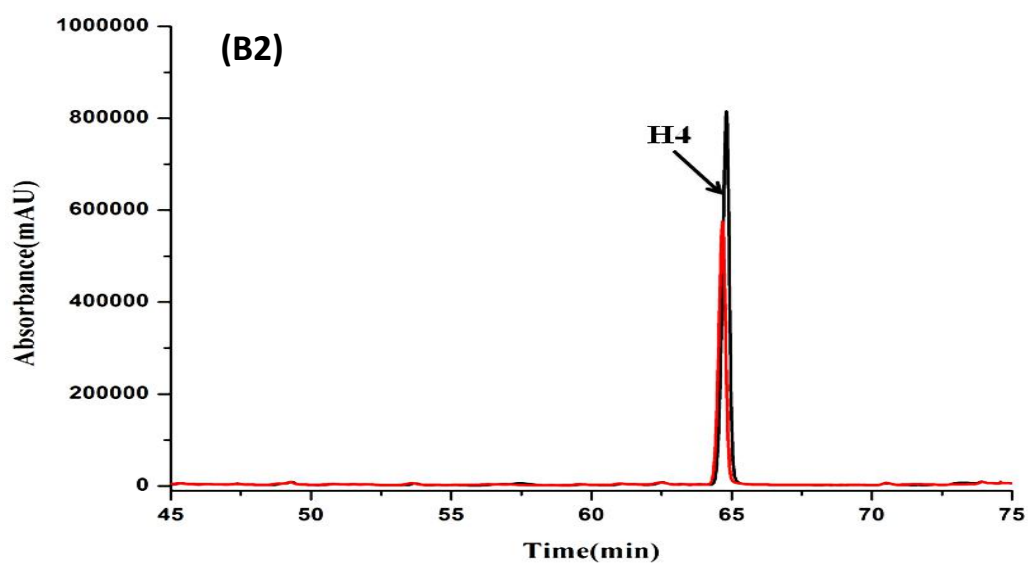

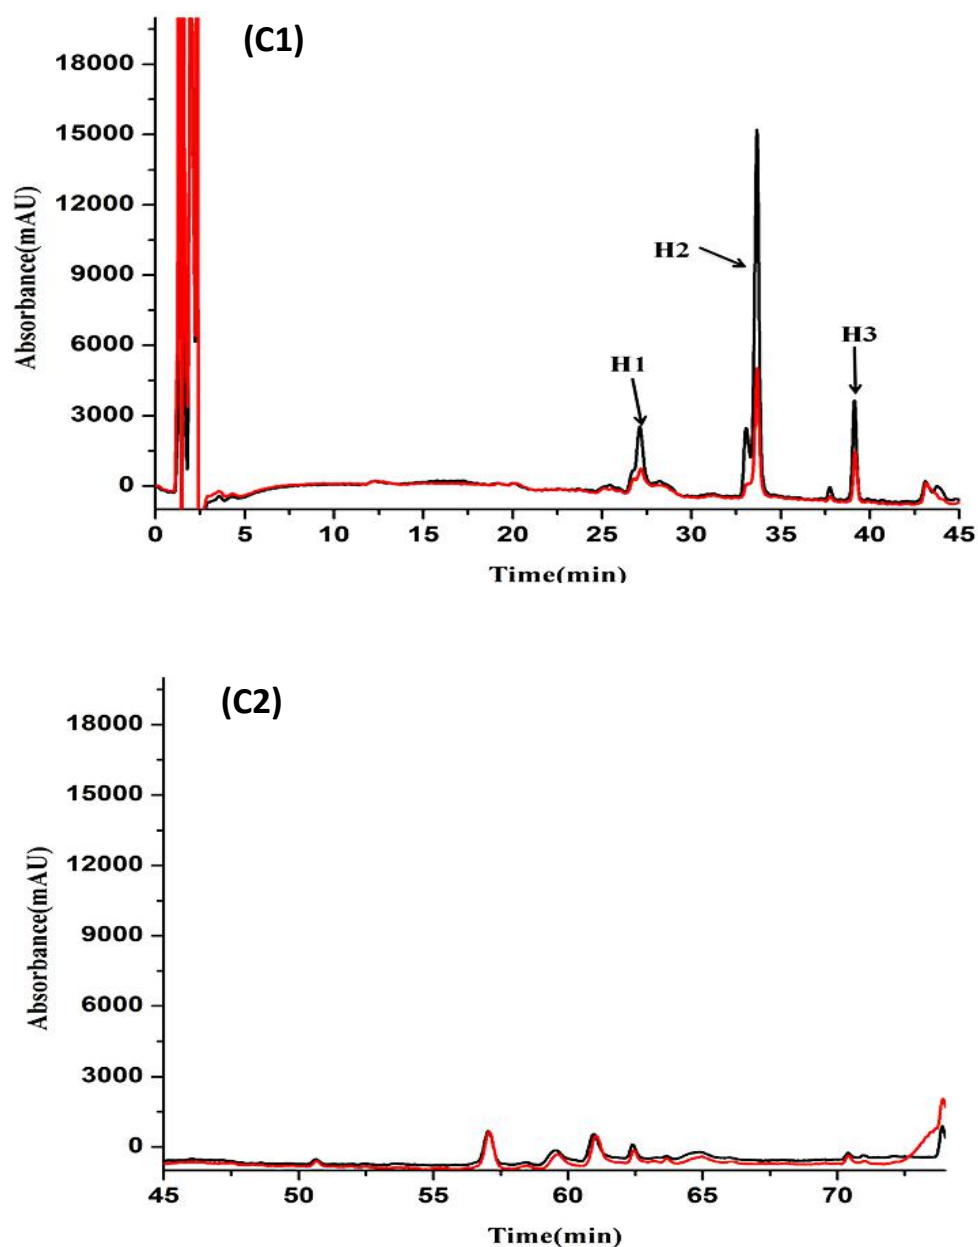

**FIGURE S7. Effect of incubation time on fishing of Parkin ligands from PCRR extract.** Incubation times were 30 (A1 and A2; A1, 0–45 min; A2, 45–75 min), 60 (B1 and B2; B1, 0–45 min; B2, 45–75 min) and 90 (C1 and C2; C1, 0–45 min; C2, 45–75 min). Compared to the control, which was comprised of denatured Parkin (red line), the HPLC chromatograms of the screened PCRR extract showed four (H1–H4) peaks that were enhanced due to specific binding with Parkin (black line). The concentrations of Parkin and PCRR sample were 1.00 g/L and 7.5 g/L, respectively.

**Table S1.** HPLC–DAD conditions for all analyzed samples

| Sample                                                                                                     | Chromatographic column                | Mobile phase                       | Eluent gradient                                                                                                                      | Injection volume (μL) | Column temperature (°C) | Flow rate ( mL/min) | Detection wavelength (nm) |
|------------------------------------------------------------------------------------------------------------|---------------------------------------|------------------------------------|--------------------------------------------------------------------------------------------------------------------------------------|-----------------------|-------------------------|---------------------|---------------------------|
| Dithiothreitol                                                                                             | shim-pack XR-ODS (2.0mm×10cm, 2.2 μm) | Water (A) and methanol (B)         | 0 min, 100%B; 2 min, 95%B; 4 min, 85%B; 7 min, 80%B; 10 min, 70%B; 15 min, 100%B                                                     | 2                     | 30                      | 0.2                 | 210                       |
| DL-selenomethionine                                                                                        | shim-pack XR-ODS (2.0mm×10cm, 2.2 μm) | Water (A) and acetonitrile (B)     | 0 min, 80%B; 3 min, 60%B; 4 min, 40%B; 5 min, 20%B; 10 min, 80%B                                                                     | 2                     | 30                      | 0.2                 | 210                       |
| Amoxicillin                                                                                                | shim-pack XR-ODS (2.0mm×10cm, 2.2 μm) | Water and methanol (85:15 v/v)     | Isocratic elution                                                                                                                    | 2                     | 30                      | 0.2                 | 210                       |
| Fenofibrate                                                                                                | shim-pack XR-ODS (2.0mm×10cm, 2.2 μm) | Water and acetonitrile (30:70 v/v) | Isocratic elution                                                                                                                    | 2                     | 30                      | 0.2                 | 286                       |
| Mixed reference solution ( comprised of dithiothreitol, dl-selenomethionine, amoxicillin and fenofibrate ) | shim-pack XR-ODS (2.0mm×10cm, 2.2 μm) | Water (A) and acetonitrile (B)     | 0.01 min, 0.2%B; 2 min, 2%B; 5 min, 8%B; 8 min, 14%B; 11.5 min, 18%B; 14 min, 70%B; 16 min, 80%B; 20 min, 95%B; 22 min, 0.2%B        | 5                     | 30                      | 0.2                 | 210                       |
| SFR extract                                                                                                | shim-pack XR-ODS (2.0mm×10cm, 2.2 μm) | Water (A) and acetonitrile (B)     | 0 min, 2%B; 15 min, 5%B; 30 min, 15%B; 40 min, 20%B; 60 min, 25%B; 75 min, 35%B; 90 min, 40%B; 105 min, 45%B; 120 min, 55%B; 130 min | 5                     | 30                      | 0.2                 | 254                       |

|              |                                          |                                   |                                                                                                          |   |    |     |     |
|--------------|------------------------------------------|-----------------------------------|----------------------------------------------------------------------------------------------------------|---|----|-----|-----|
|              |                                          |                                   | 65%B; 140min 85%B                                                                                        |   |    |     |     |
| PCRR extract | shim-pack XR-ODS<br>(2.0mm×10cm, 2.2 μm) | Water (A) and<br>acetonitrile (B) | 0 min, 5%B; 10 min, 15%B; 20<br>min, 20%B; 35 min, 30%B; 55<br>min, 40%B; 70 min, 60%B; 75<br>min, 100%B | 5 | 30 | 0.2 | 210 |



**Table S2.** LC/MS data for the four reference solutions.

| Reference           | t <sub>R</sub><br>(min) | P <sup>a</sup><br>(%, n=3) | UV<br>λ <sub>max</sub><br>(nm) | [M+H] <sup>+</sup><br>m/z | ESI-MS <sup>n</sup> (+)<br>m/z (abundance)                     | [M-H] <sup>+</sup><br>m/z | ESI-MS <sup>n</sup> (-)<br>m/z (abundance)                |
|---------------------|-------------------------|----------------------------|--------------------------------|---------------------------|----------------------------------------------------------------|---------------------------|-----------------------------------------------------------|
| DL-Dithiothreitol   | 2.341                   | 56.3 ±<br>15.5             | 204                            | 155.25                    | —                                                              | —                         | MS <sup>2</sup> (153):117(100),151<br>(50),105(42),88(14) |
| DL-selenomethionine | 11.926                  | 37.1 ±<br>12.2             | 202                            | 197.11                    | MS <sup>2</sup> (196):181(100)<br>,153(45),134(25),1<br>08(20) | —                         | —                                                         |
| Amoxicillin         | 14.106                  | 12 ± 2.3                   | 270                            | 366.1084                  | MS <sup>2</sup> (366):114(100)<br>,208(17)                     | —                         | —                                                         |
| Fenofibrate         | 5.325                   | 6.1 ± 7.4                  | 286                            | 361.1                     | MS <sup>2</sup> (361):232(100)<br>,138(10)                     | —                         | —                                                         |

<sup>a</sup>Δ*P* was calculated using the following equation:

$\Delta P = (Pe - Pc) / Pe \times 100$ , where *Pe* and *Pc* are the peak areas in the experiment and control, respectively. Data were obtained from 3 independent experiments and are expressed as the mean ± SD.

**Table S3.** LC/MS data and assignment of four Parkin ligands in SFR extract.

| NO.             | t <sub>R</sub> (min) | $\Delta P^b$<br>(%,n=3) | UV<br>$\lambda_{max}$<br>(nm) | $[M+H]^+$<br>$[M+Na]^+m/z$ | ESI-MS <sup>a</sup> (+)<br>m/z (abundance)                                                                                                                     | $[M-H]^+m/z$ | ESI-MS <sup>a</sup> (-)<br>m/z (abundance)                                                                                                                                                     | Predicted<br>formula                           | Meas<br>(m/z) | Pred<br>(m/z) | Diff<br>(ppm) | DBE | Assigned<br>identification                                           |
|-----------------|----------------------|-------------------------|-------------------------------|----------------------------|----------------------------------------------------------------------------------------------------------------------------------------------------------------|--------------|------------------------------------------------------------------------------------------------------------------------------------------------------------------------------------------------|------------------------------------------------|---------------|---------------|---------------|-----|----------------------------------------------------------------------|
| K1              | 79.152               |                         | 289                           | 355.14                     | MS <sup>2</sup> (355):179(100),299(23),235(21),193(2)<br>MS <sup>3</sup> (179):109(100)                                                                        | 353.1367     | MS <sup>2</sup> (353):233(100),218(13),232(11),247(9),234(6)<br>MS <sup>3</sup> (233):218(100),217(76),189(76),163(76)                                                                         | C <sub>21</sub> H <sub>22</sub> O <sub>5</sub> | 353.1367      | 353.1394      | -7.65         | 11  | 7,4'-dihydroxy-5-methoxy-8-( $\gamma,\gamma$ -dimethylallyl)-flavone |
| K2 <sup>a</sup> | 86.152               | 27 $\pm$ 7.2            | 198,287                       | 455.1983                   | MS <sup>2</sup> (455):303(100),179(39),304(20),313(4)<br>MS <sup>3</sup> (303):179(100),180(7),178(2)                                                          | 453.1932     | MS <sup>2</sup> (453):275(100),177(99),421(36),149(30),276(18),178(13),303(11),455(11),422(10),435(10)<br>MS <sup>3</sup> (275):151(100),124(62),139(49),191(21),137(11),139(11),140(7)        | C <sub>26</sub> H <sub>30</sub> O <sub>7</sub> | 453.1932      | 453.1919      | 2.87          | 12  | Kushenol I                                                           |
| K3 <sup>a</sup> | 90.763               | 37.8 $\pm$ 12.4         | 292                           | 439.1657                   | MS <sup>2</sup> (439):315(100),316(14),440(3)<br>MS <sup>3</sup> (315):316(74),241(59),165(49),217(43),163(35),213(34),149(32),187(21),273(20),185(16),199(15) | 437.1603     | MS <sup>2</sup> (437):287(100),261(62),438(50),161(39),313(39),314(35),439(33),325(29),288(24),210(23),241(21),275(15),314(14),299(14),243(13),262(13),176(11),190(11),285(11),437(10),419(10) | C <sub>26</sub> H <sub>30</sub> O <sub>6</sub> | 437.1603      | 437.1606      | -0.69         | 12  | Kurarinone                                                           |
| K4 <sup>a</sup> | 104.494              | 22.9 $\pm$ 13.1         | 233,291                       | 425.1897                   | MS <sup>2</sup> (425):283(100),301(96),289(5),283(1)<br>MS <sup>3</sup> (283):213(100),185(61),255(35),187(34),227(28),256(19),254(3),157(3)                   | 423.1812     | MS <sup>2</sup> (423):261(100),262(18),161(10),261(7),260(4)<br>MS <sup>3</sup> (261):149(100),137(82),192(79)                                                                                 | C <sub>25</sub> H <sub>28</sub> O <sub>6</sub> | 423.1812      | 423.1813      | 0.24          | 12  | Sophoraflavanone G                                                   |

<sup>a</sup> Compared with reference solutions.

<sup>b</sup>  $P$  was calculated using the following equation:

$P = (P_e - P_c)/P_e \times 100$ , where  $P_e$  and  $P_c$  are the peak areas in the experiment and control, respectively. Data were obtained from 3 independent experiments and are expressed as the mean  $\pm$  SD.

**Table S4.** LC/MS data and assignment of four Parkin ligands in PCRR extract.

| NO.             | t <sub>R</sub> (min) | $\Delta P^b$<br>(%,n=3) | UV<br>$\lambda_{\max}$<br>(nm) | $[M+H]^+$<br>$[M+Na]^+m/z$ | ESI-MS <sup>a</sup> (+)<br>m/z (abundance)                                                                          | $[M-H]^+$<br>m/z | ESI-MS <sup>a</sup> (-)<br>m/z (abundance)                                                                                                          | Predicted<br>formula                           | Meas<br>(m/z) | Pred<br>(m/z) | Diff<br>(ppm) | DBE | Assigned<br>identification |
|-----------------|----------------------|-------------------------|--------------------------------|----------------------------|---------------------------------------------------------------------------------------------------------------------|------------------|-----------------------------------------------------------------------------------------------------------------------------------------------------|------------------------------------------------|---------------|---------------|---------------|-----|----------------------------|
| H1              | 27.627               |                         | 236                            | 409.1458                   | MS2(409):247(100),229(28),205(1),336(1)<br>MS3(247):229(100),205(12),214(12)                                        | 407.1332         | MS2(407):245(100),246(18),230(16),244(8),245(6)<br>MS3(245):230(100),215(6),230(5),229(4),231(3)                                                    | C <sub>20</sub> H <sub>24</sub> O <sub>9</sub> | 407.1332      | 407.1348      | 3.93          | 9   | Torachrysone-8-O-glucoside |
| H2 <sup>a</sup> | 34.646               | 65.8 ± 27.1             | 222,272,424                    | 271.0488                   | MS2(271):229(100),201(40),173(11),197(8),187(6),230(6)<br>MS3(229):187(100),129(43),135(43),145(43),188(49),201(43) | 269.0450         | MS2(269):225(100)                                                                                                                                   | C <sub>15</sub> H <sub>10</sub> O <sub>5</sub> | 269.0450      | 269.0455      | 1.86          | 0   | Apigenin                   |
| H3              | 39.273               | 28.4 ± 19.4             | 223,270,425                    | 285.0663                   | MS2(285):211(100),242(72),253(31),213(27),270(24),239(23),257(23),151(22),225(17),269(15)<br>MS3(285):168(100)      | 283.0581         | MS2(283):240(100),253(31),241(11),239(6)<br>MS3(240):184(100),212(90),197(62),213(60)                                                               | C <sub>16</sub> H <sub>12</sub> O <sub>5</sub> | 283.0581      | 283.0612      | -10.95        | 11  | Unidentified               |
| H4 <sup>a</sup> | 64.811               | 38.1 ± 31.8             | 222,266,286,439                | 271.0475                   | MS2(271):229(100),201(22),173(17),197(9),187(9),230(9)<br>MS3(229):173(100),187(74),201(66),117(66),145(49)         | 269.0452         | MS2(269):225(100),270(35),241(26),226(20),181(13),197(13),210(10),271(9),182(7),225(7)<br>MS3(225):210(100),181(70),195(56),182(29),197(21),180(17) | C <sub>15</sub> H <sub>10</sub> O <sub>5</sub> | 269.0454      | 269.0455      | -0.37         | 11  | Emodin                     |

<sup>a</sup> Compared with reference solutions.

<sup>b</sup>  $P$  was calculated using the following equation:

$P = (P_e - P_c)/P_e \times 100$ , where  $P_e$  and  $P_c$  are the peak areas in the experiment and control, respectively. Data were obtained from 3 independent experiments and are expressed as the mean ± SD.
